# Supplementary material for: Prevalence and incidence of type 1 diabetes in the world: a systematic review and meta-analysis
Source: PubMed Central journal article supplement (PMC7146037; doi:10.34172/hpp.2020.18), 2020-03-30
Supplement: hpp-10-98-s001.pdf [file hpp-10-98-s001.pdf]

Supplementary file 1. Search Strategy of PubMed

| Search | Query                                                                                                                                                                                                                                                                                                                                                                                                                                                                                                                                                                                                                                                                                                                                                                                                                                                                                                                                                                                                                                                                                                                                                                                                                                                                                                                                      | Items found           |
|--------|--------------------------------------------------------------------------------------------------------------------------------------------------------------------------------------------------------------------------------------------------------------------------------------------------------------------------------------------------------------------------------------------------------------------------------------------------------------------------------------------------------------------------------------------------------------------------------------------------------------------------------------------------------------------------------------------------------------------------------------------------------------------------------------------------------------------------------------------------------------------------------------------------------------------------------------------------------------------------------------------------------------------------------------------------------------------------------------------------------------------------------------------------------------------------------------------------------------------------------------------------------------------------------------------------------------------------------------------|-----------------------|
| #13    | <p>Search (((("Diabetes Mellitus, Type 1"[Mesh]) OR<br/>           (((((((((((((((((((IDDM[Title/Abstract]) OR T1DM[Title/Abstract]) OR<br/>           "Type 1 Diabetes"[Title/Abstract]) OR "Autoimmune<br/>           Diabetes"[Title/Abstract]) OR "Juvenile Onset<br/>           Diabetes"[Title/Abstract]) OR "Juvenile-Onset<br/>           Diabetes"[Title/Abstract]) OR "Brittle Diabetes<br/>           Mellitus"[Title/Abstract]) OR "brittle diabetes"[Title/Abstract]) OR<br/>           "diabetes mellitus type 1"[Title/Abstract]) OR "diabetes mellitus type<br/>           I"[Title/Abstract]) OR "diabetes type 1"[Title/Abstract]) OR<br/>           "diabetes type I"[Title/Abstract]) OR "early onset diabetes<br/>           mellitus"[Title/Abstract]) OR "insulin dependent<br/>           diabetes"[Title/Abstract]) OR "juvenile diabetes"[Title/Abstract]) OR<br/>           "juvenile diabetes mellitus"[Title/Abstract]) OR "type I<br/>           diabetes"[Title/Abstract]) OR "type I diabetes<br/>           mellitus"[Title/Abstract]) OR "Insulin Dependent Diabetes<br/>           Mellitus"[Title/Abstract]) OR "Insulin-Dependent Diabetes<br/>           Mellitus"[Title/Abstract]))) AND (("Incidence"[Mesh]) OR<br/>           ((Incidence[Title/Abstract]) OR Incidences[Title/Abstract]))</p>    | <a href="#">7621</a>  |
| #12    | <p>Search (((("Diabetes Mellitus, Type 1"[Mesh]) OR<br/>           (((((((((((((((((((IDDM[Title/Abstract]) OR T1DM[Title/Abstract]) OR<br/>           "Type 1 Diabetes"[Title/Abstract]) OR "Autoimmune<br/>           Diabetes"[Title/Abstract]) OR "Juvenile Onset<br/>           Diabetes"[Title/Abstract]) OR "Juvenile-Onset<br/>           Diabetes"[Title/Abstract]) OR "Brittle Diabetes<br/>           Mellitus"[Title/Abstract]) OR "brittle diabetes"[Title/Abstract]) OR<br/>           "diabetes mellitus type 1"[Title/Abstract]) OR "diabetes mellitus type<br/>           I"[Title/Abstract]) OR "diabetes type 1"[Title/Abstract]) OR<br/>           "diabetes type I"[Title/Abstract]) OR "early onset diabetes<br/>           mellitus"[Title/Abstract]) OR "insulin dependent<br/>           diabetes"[Title/Abstract]) OR "juvenile diabetes"[Title/Abstract]) OR<br/>           "juvenile diabetes mellitus"[Title/Abstract]) OR "type I<br/>           diabetes"[Title/Abstract]) OR "type I diabetes<br/>           mellitus"[Title/Abstract]) OR "Insulin Dependent Diabetes<br/>           Mellitus"[Title/Abstract]) OR "Insulin-Dependent Diabetes<br/>           Mellitus"[Title/Abstract]))) AND (("Prevalence"[Mesh]) OR<br/>           ((Prevalence[Title/Abstract]) OR Prevalences[Title/Abstract]))</p> | <a href="#">7329</a>  |
| #11    | <p>Search (((("Diabetes Mellitus, Type 1"[Mesh]) OR<br/>           (((((((((((((((((((IDDM[Title/Abstract]) OR T1DM[Title/Abstract]) OR<br/>           "Type 1 Diabetes"[Title/Abstract]) OR "Autoimmune<br/>           Diabetes"[Title/Abstract]) OR "Juvenile Onset<br/>           Diabetes"[Title/Abstract]) OR "Juvenile-Onset<br/>           Diabetes"[Title/Abstract]) OR "Brittle Diabetes<br/>           Mellitus"[Title/Abstract]) OR "brittle diabetes"[Title/Abstract]) OR<br/>           "diabetes mellitus type 1"[Title/Abstract]) OR "diabetes mellitus type<br/>           I"[Title/Abstract]) OR "diabetes type 1"[Title/Abstract]) OR<br/>           "diabetes type I"[Title/Abstract]) OR "early onset diabetes<br/>           mellitus"[Title/Abstract]) OR "insulin dependent<br/>           diabetes"[Title/Abstract]) OR "juvenile diabetes"[Title/Abstract]) OR<br/>           "juvenile diabetes mellitus"[Title/Abstract]) OR "type I<br/>           diabetes"[Title/Abstract]) OR "type I diabetes<br/>           mellitus"[Title/Abstract]) OR "Insulin Dependent Diabetes<br/>           Mellitus"[Title/Abstract]) OR "Insulin-Dependent Diabetes<br/>           Mellitus"[Title/Abstract])))</p>                                                                                                            | <a href="#">13638</a> |

| Search              | Query                                                                                                                                                                                                                                                                                                                                                                                                                                                                                                                                                                                                                                                                                                                                                                                                                                                                                                                                                                 | Items found             |
|---------------------|-----------------------------------------------------------------------------------------------------------------------------------------------------------------------------------------------------------------------------------------------------------------------------------------------------------------------------------------------------------------------------------------------------------------------------------------------------------------------------------------------------------------------------------------------------------------------------------------------------------------------------------------------------------------------------------------------------------------------------------------------------------------------------------------------------------------------------------------------------------------------------------------------------------------------------------------------------------------------|-------------------------|
|                     | I"[Title/Abstract]) OR "diabetes type 1"[Title/Abstract]) OR "diabetes type I"[Title/Abstract]) OR "early onset diabetes mellitus"[Title/Abstract]) OR "insulin dependent diabetes"[Title/Abstract]) OR "juvenile diabetes"[Title/Abstract]) OR "juvenile diabetes mellitus"[Title/Abstract]) OR "type I diabetes"[Title/Abstract]) OR "type I diabetes mellitus"[Title/Abstract]) OR "Insulin Dependent Diabetes Mellitus"[Title/Abstract]) OR "Insulin-Dependent Diabetes Mellitus"[Title/Abstract])) AND (((("Prevalence"[Mesh]) OR ((Prevalence[Title/Abstract]) OR Prevalences[Title/Abstract]))) OR (((("Incidence"[Mesh]) OR ((Incidence[Title/Abstract]) OR Incidences[Title/Abstract])))                                                                                                                                                                                                                                                                     |                         |
| <a href="#">#10</a> | Search (((("Prevalence"[Mesh]) OR ((Prevalence[Title/Abstract]) OR Prevalences[Title/Abstract]))) OR (((("Incidence"[Mesh]) OR ((Incidence[Title/Abstract]) OR Incidences[Title/Abstract])))                                                                                                                                                                                                                                                                                                                                                                                                                                                                                                                                                                                                                                                                                                                                                                          | <a href="#">1415850</a> |
| <a href="#">#9</a>  | Search ("Incidence"[Mesh]) OR ((Incidence[Title/Abstract]) OR Incidences[Title/Abstract])                                                                                                                                                                                                                                                                                                                                                                                                                                                                                                                                                                                                                                                                                                                                                                                                                                                                             | <a href="#">827503</a>  |
| <a href="#">#8</a>  | Search (Incidence[Title/Abstract]) OR Incidences[Title/Abstract]                                                                                                                                                                                                                                                                                                                                                                                                                                                                                                                                                                                                                                                                                                                                                                                                                                                                                                      | <a href="#">727288</a>  |
| <a href="#">#7</a>  | Search "Incidence"[Mesh]                                                                                                                                                                                                                                                                                                                                                                                                                                                                                                                                                                                                                                                                                                                                                                                                                                                                                                                                              | <a href="#">248745</a>  |
| <a href="#">#6</a>  | Search ("Prevalence"[Mesh]) OR ((Prevalence[Title/Abstract]) OR Prevalences[Title/Abstract])                                                                                                                                                                                                                                                                                                                                                                                                                                                                                                                                                                                                                                                                                                                                                                                                                                                                          | <a href="#">671215</a>  |
| <a href="#">#5</a>  | Search (Prevalence[Title/Abstract]) OR Prevalences[Title/Abstract]                                                                                                                                                                                                                                                                                                                                                                                                                                                                                                                                                                                                                                                                                                                                                                                                                                                                                                    | <a href="#">590477</a>  |
| <a href="#">#4</a>  | Search "Prevalence"[Mesh]                                                                                                                                                                                                                                                                                                                                                                                                                                                                                                                                                                                                                                                                                                                                                                                                                                                                                                                                             | <a href="#">275324</a>  |
| <a href="#">#3</a>  | Search ("Diabetes Mellitus, Type 1"[Mesh]) OR (((((((((((((((((((((IDDM[Title/Abstract]) OR T1DM[Title/Abstract]) OR "Type 1 Diabetes"[Title/Abstract]) OR "Autoimmune Diabetes"[Title/Abstract]) OR "Juvenile Onset Diabetes"[Title/Abstract]) OR "Juvenile-Onset Diabetes"[Title/Abstract]) OR "Brittle Diabetes Mellitus"[Title/Abstract]) OR "brittle diabetes"[Title/Abstract]) OR "diabetes mellitus type 1"[Title/Abstract]) OR "diabetes mellitus type I"[Title/Abstract]) OR "diabetes type 1"[Title/Abstract]) OR "diabetes type I"[Title/Abstract]) OR "early onset diabetes mellitus"[Title/Abstract]) OR "insulin dependent diabetes"[Title/Abstract]) OR "juvenile diabetes"[Title/Abstract]) OR "juvenile diabetes mellitus"[Title/Abstract]) OR "type I diabetes"[Title/Abstract]) OR "type I diabetes mellitus"[Title/Abstract]) OR "Insulin Dependent Diabetes Mellitus"[Title/Abstract]) OR "Insulin-Dependent Diabetes Mellitus"[Title/Abstract]) | <a href="#">99341</a>   |
| <a href="#">#2</a>  | Search (((((((((((((((((((((IDDM[Title/Abstract]) OR T1DM[Title/Abstract]) OR "Type 1 Diabetes"[Title/Abstract]) OR "Autoimmune Diabetes"[Title/Abstract]) OR "Juvenile Onset Diabetes"[Title/Abstract]) OR "Juvenile-Onset Diabetes"[Title/Abstract]) OR "Brittle Diabetes Mellitus"[Title/Abstract]) OR "brittle diabetes"[Title/Abstract]) OR "diabetes mellitus type 1"[Title/Abstract]) OR "diabetes mellitus type I"[Title/Abstract]) OR "diabetes type 1"[Title/Abstract]) OR "diabetes type I"[Title/Abstract]) OR "early onset diabetes mellitus"[Title/Abstract]) OR "insulin dependent diabetes"[Title/Abstract]) OR "juvenile diabetes"[Title/Abstract]) OR "juvenile diabetes mellitus"[Title/Abstract]) OR "type I diabetes"[Title/Abstract]) OR "type I diabetes mellitus"[Title/Abstract]) OR "Insulin Dependent Diabetes Mellitus"[Title/Abstract]) OR "Insulin-Dependent Diabetes Mellitus"[Title/Abstract])                                        | <a href="#">68175</a>   |

| Search             | Query                                                                                                                                                                                                                                                                                                                                                                                                                                                                                                                                                                                                                                             | Items found           |
|--------------------|---------------------------------------------------------------------------------------------------------------------------------------------------------------------------------------------------------------------------------------------------------------------------------------------------------------------------------------------------------------------------------------------------------------------------------------------------------------------------------------------------------------------------------------------------------------------------------------------------------------------------------------------------|-----------------------|
|                    | Mellitus"[Title/Abstract]) OR "brittle diabetes"[Title/Abstract]) OR "diabetes mellitus type 1"[Title/Abstract]) OR "diabetes mellitus type I"[Title/Abstract]) OR "diabetes type 1"[Title/Abstract]) OR "diabetes type I"[Title/Abstract]) OR "early onset diabetes mellitus"[Title/Abstract]) OR "insulin dependent diabetes"[Title/Abstract]) OR "juvenile diabetes"[Title/Abstract]) OR "juvenile diabetes mellitus"[Title/Abstract]) OR "type I diabetes"[Title/Abstract]) OR "type I diabetes mellitus"[Title/Abstract]) OR "Insulin Dependent Diabetes Mellitus"[Title/Abstract]) OR "Insulin-Dependent Diabetes Mellitus"[Title/Abstract] |                       |
| <a href="#">#1</a> | Search "Diabetes Mellitus, Type 1"[Mesh]                                                                                                                                                                                                                                                                                                                                                                                                                                                                                                                                                                                                          | <a href="#">73750</a> |

### Search Strategy of Embase

#13  
#3 AND #9  
[11,162](#)  
#12  
#3 AND #6  
[12,085](#)  
#11  
#3 AND #10  
[21,010](#)  
#10  
#6 OR #9  
[2,051,248](#)  
#9  
#7 OR #8  
[1,174,867](#)  
#8  
incidence\*:ab,ti  
[1,038,681](#)  
#7  
'incidence'/exp  
[444,375](#)  
#6  
#4 OR #5  
[1,004,060](#)  
#5  
prevalence\*:ab,ti  
[831,765](#)  
#4  
'prevalence'/exp

[695,313](#)

#3

#1 OR #2

[140,799](#)

#2

iddm:ab,ti OR t1dm:ab,ti OR 'type 1 diabetes':ab,ti OR 'autoimmune diabetes':ab,ti OR 'juvenile onset diabetes':ab,ti OR 'juvenile-onset diabetes':ab,ti OR 'brittle diabetes mellitus':ab,ti OR 'brittle diabetes':ab,ti OR 'diabetes mellitus type 1':ab,ti OR 'diabetes mellitus type i':ab,ti OR 'diabetes type 1':ab,ti OR 'diabetes type i':ab,ti OR 'early onset diabetes mellitus':ab,ti OR 'insulin dependent diabetes':ab,ti OR 'juvenile diabetes':ab,ti OR 'juvenile diabetes mellitus':ab,ti OR 'type i diabetes':ab,ti OR 'type i diabetes mellitus':ab,ti OR 'insulin dependent diabetes mellitus':ab,ti OR 'insulin-dependent diabetes mellitus':ab,ti

[96,781](#)

#1

'insulin dependent diabetes mellitus'/exp

[113,761](#)
